# Supplementary material
Source: MDPI journal article supplement (https://www.mdpi.com/2075-163X/12/8/923)
Supplement: s1 [file s1]

| Sample: LAZK001-01 | Content (ppm) and ratio |                  |                                     | Isotopic ratio                       |         |                                     |         |                                     |         | Age (Ma)                             |     |                                     |    |                                     |     |
|--------------------|-------------------------|------------------|-------------------------------------|--------------------------------------|---------|-------------------------------------|---------|-------------------------------------|---------|--------------------------------------|-----|-------------------------------------|----|-------------------------------------|-----|
| Sport              | <sup>232</sup> Th       | <sup>238</sup> U | <sup>232</sup> Th/ <sup>238</sup> U | <sup>207</sup> Pb/ <sup>206</sup> Pb |         | <sup>207</sup> Pb/ <sup>235</sup> U |         | <sup>206</sup> Pb/ <sup>238</sup> U |         | <sup>207</sup> Pb/ <sup>206</sup> Pb |     | <sup>207</sup> Pb/ <sup>235</sup> U |    | <sup>206</sup> Pb/ <sup>238</sup> U |     |
|                    |                         |                  |                                     | Ratio                                | 1σ      | Ratio                               | 1σ      | Ratio                               | 1σ      | Age                                  | 1σ  | Age                                 | 1σ | Age                                 | 1σ  |
| ILAZK001-01-01     | 150.48                  | 221.21           | 0.68                                | 0.11102                              | 0.00306 | 5.23603                             | 0.32729 | 0.34487                             | 0.01802 | 1816                                 | 49  | 1859                                | 53 | 1910                                | 86  |
| ILAZK001-01-02     | 150.40                  | 298.86           | 0.50                                | 0.11278                              | 0.00317 | 4.87029                             | 0.30808 | 0.31482                             | 0.01625 | 1845                                 | 46  | 1797                                | 53 | 1764                                | 80  |
| ILAZK001-01-03     | 287.18                  | 533.95           | 0.54                                | 0.05961                              | 0.00187 | 0.82419                             | 0.05638 | 0.10084                             | 0.00525 | 590                                  | 65  | 610                                 | 31 | 619                                 | 31  |
| ILAZK001-01-04     | 279.21                  | 550.06           | 0.51                                | 0.05946                              | 0.00185 | 0.78542                             | 0.05291 | 0.09642                             | 0.00487 | 584                                  | 64  | 589                                 | 30 | 593                                 | 29  |
| ILAZK001-01-05     | 184.80                  | 225.17           | 0.82                                | 0.16652                              | 0.00446 | 10.72965                            | 0.65536 | 0.46925                             | 0.02455 | 2523                                 | 44  | 2500                                | 57 | 2480                                | 108 |
| ILAZK001-01-06     | 172.83                  | 188.30           | 0.92                                | 0.16236                              | 0.00441 | 11.79407                            | 0.73035 | 0.52739                             | 0.02766 | 2480                                 | 42  | 2588                                | 58 | 2730                                | 117 |
| ILAZK001-01-07     | 78.89                   | 381.22           | 0.21                                | 0.06164                              | 0.00180 | 0.95911                             | 0.06301 | 0.11403                             | 0.00606 | 662                                  | 62  | 683                                 | 33 | 696                                 | 35  |
| ILAZK001-01-08     | 106.92                  | 522.30           | 0.20                                | 0.06156                              | 0.00204 | 0.93512                             | 0.06622 | 0.10827                             | 0.00561 | 659                                  | 72  | 670                                 | 35 | 663                                 | 33  |
| ILAZK001-01-09     | 373.53                  | 824.01           | 0.45                                | 0.05862                              | 0.00186 | 0.65237                             | 0.04537 | 0.08151                             | 0.00435 | 553                                  | 65  | 510                                 | 28 | 505                                 | 26  |
| ILAZK001-01-10     | 316.66                  | 918.58           | 0.34                                | 0.06130                              | 0.00186 | 0.67464                             | 0.04574 | 0.08027                             | 0.00434 | 650                                  | 64  | 524                                 | 28 | 498                                 | 26  |
| ILAZK001-01-11     | 41.55                   | 615.39           | 0.07                                | 0.08301                              | 0.00278 | 2.21720                             | 0.15905 | 0.19439                             | 0.01019 | 1270                                 | 65  | 1186                                | 50 | 1145                                | 55  |
| ILAZK001-01-12     | 4725.29                 | 1099.04          | 4.30                                | 0.07824                              | 0.00226 | 2.12508                             | 0.13729 | 0.19781                             | 0.01019 | 1153                                 | 60  | 1157                                | 45 | 1164                                | 55  |
| ILAZK001-01-13     | 566.97                  | 1163.22          | 0.49                                | 0.05958                              | 0.00206 | 0.66938                             | 0.04962 | 0.08107                             | 0.00439 | 588                                  | 73  | 520                                 | 30 | 503                                 | 26  |
| ILAZK001-01-14     | 534.58                  | 956.14           | 0.56                                | 0.06258                              | 0.00197 | 0.76263                             | 0.05246 | 0.08895                             | 0.00467 | 694                                  | 67  | 576                                 | 30 | 549                                 | 28  |
| ILAZK001-01-15     | 406.24                  | 1259.60          | 0.32                                | 0.04571                              | 0.00287 | 0.09339                             | 0.01009 | 0.01506                             | 0.00084 | -17                                  | 125 | 91                                  | 9  | 96                                  | 5   |
| ILAZK001-01-16     | 967.99                  | 2797.71          | 0.35                                | 0.05622                              | 0.00168 | 0.66353                             | 0.04409 | 0.08601                             | 0.00450 | 461                                  | 64  | 517                                 | 27 | 532                                 | 27  |
| ILAZK001-01-17     | 188.01                  | 399.72           | 0.47                                | 0.05904                              | 0.00240 | 0.65302                             | 0.05258 | 0.08081                             | 0.00420 | 569                                  | 84  | 510                                 | 32 | 501                                 | 25  |
| ILAZK001-01-18     | 433.34                  | 1073.76          | 0.40                                | 0.06093                              | 0.00189 | 0.73321                             | 0.04930 | 0.08828                             | 0.00444 | 637                                  | 62  | 558                                 | 29 | 545                                 | 26  |
| ILAZK001-01-19     | 399.95                  | 814.32           | 0.49                                | 0.05629                              | 0.00202 | 0.65945                             | 0.04896 | 0.08577                             | 0.00440 | 464                                  | 78  | 514                                 | 30 | 530                                 | 26  |
| ILAZK001-01-20     | 532.60                  | 945.53           | 0.56                                | 0.05512                              | 0.00177 | 0.60340                             | 0.04201 | 0.07980                             | 0.00415 | 417                                  | 70  | 479                                 | 27 | 495                                 | 25  |
| ILAZK001-01-21     | 311.27                  | 544.76           | 0.57                                | 0.05348                              | 0.00171 | 0.59606                             | 0.04194 | 0.08135                             | 0.00440 | 349                                  | 75  | 475                                 | 27 | 504                                 | 26  |
| ILAZK001-01-22     | 598.92                  | 866.20           | 0.69                                | 0.06668                              | 0.00303 | 0.67092                             | 0.05751 | 0.07351                             | 0.00377 | 828                                  | 98  | 521                                 | 35 | 457                                 | 23  |

|                |        |         |      |         |         |         |         |         |         |      |     |      |     |      |    |
|----------------|--------|---------|------|---------|---------|---------|---------|---------|---------|------|-----|------|-----|------|----|
| ILAZK001-01-23 | 665.64 | 1327.41 | 0.50 | 0.05746 | 0.00165 | 0.64375 | 0.04154 | 0.08180 | 0.00426 | 509  | 65  | 505  | 26  | 507  | 25 |
| ILAZK001-01-24 | 236.71 | 586.40  | 0.40 | 0.05738 | 0.00218 | 0.65194 | 0.04998 | 0.08319 | 0.00424 | 506  | 83  | 510  | 31  | 515  | 25 |
| ILAZK001-01-25 | 871.89 | 1023.03 | 0.85 | 0.05670 | 0.00188 | 0.60156 | 0.04319 | 0.07726 | 0.00413 | 480  | 71  | 478  | 27  | 480  | 25 |
| ILAZK001-01-26 | 107.68 | 231.22  | 0.47 | 0.10986 | 0.00297 | 5.19800 | 0.32044 | 0.34512 | 0.01804 | 1797 | 46  | 1852 | 52  | 1911 | 86 |
| ILAZK001-01-27 | 902.63 | 1520.44 | 0.59 | 0.05941 | 0.00174 | 0.66616 | 0.04370 | 0.08173 | 0.00431 | 582  | 59  | 518  | 27  | 506  | 26 |
| ILAZK001-01-28 | 107.67 | 293.33  | 0.37 | 0.07996 | 0.00234 | 2.48869 | 0.16288 | 0.22680 | 0.01193 | 1196 | 52  | 1269 | 47  | 1318 | 63 |
| ILAZK001-01-29 | 130.29 | 401.92  | 0.32 | 0.08855 | 0.01122 | 2.73410 | 0.47379 | 0.22393 | 0.01348 | 1395 | 232 | 1338 | 129 | 1303 | 71 |

| Sample: LHJT-01 | Content (ppm) and ratio |                  |                                     | Isotopic ratio                       |         |                                     |         |                                     |         | Age (Ma)                             |    |                                     |    |                                     |    |
|-----------------|-------------------------|------------------|-------------------------------------|--------------------------------------|---------|-------------------------------------|---------|-------------------------------------|---------|--------------------------------------|----|-------------------------------------|----|-------------------------------------|----|
| Sport           | <sup>232</sup> Th       | <sup>238</sup> U | <sup>232</sup> Th/ <sup>238</sup> U | <sup>207</sup> Pb/ <sup>206</sup> Pb |         | <sup>207</sup> Pb/ <sup>235</sup> U |         | <sup>206</sup> Pb/ <sup>238</sup> U |         | <sup>207</sup> Pb/ <sup>206</sup> Pb |    | <sup>207</sup> Pb/ <sup>235</sup> U |    | <sup>206</sup> Pb/ <sup>238</sup> U |    |
|                 |                         |                  |                                     | Ratio                                | 1σ      | Ratio                               | 1σ      | Ratio                               | 1σ      | Age                                  | 1σ | Age                                 | 1σ | Age                                 | 1σ |
| ILHJT.01-1      | 589.05                  | 790.52           | 0.75                                | 0.05962                              | 0.00140 | 0.74159                             | 0.01790 | 0.09022                             | 0.00081 | 590                                  | 51 | 563                                 | 14 | 557                                 | 5  |
| ILHJT.01-2      | 167.56                  | 391.70           | 0.43                                | 0.05910                              | 0.00229 | 0.61846                             | 0.02454 | 0.07589                             | 0.00065 | 571                                  | 84 | 489                                 | 19 | 472                                 | 4  |
| ILHJT.01-3      | 99.01                   | 1451.47          | 0.07                                | 0.05702                              | 0.00128 | 0.60553                             | 0.01398 | 0.07702                             | 0.00065 | 492                                  | 49 | 481                                 | 11 | 478                                 | 4  |
| ILHJT.01-4      | 1084.84                 | 3866.57          | 0.28                                | 0.14519                              | 0.00317 | 2.30062                             | 0.05345 | 0.11493                             | 0.00120 | 2290                                 | 38 | 1212                                | 28 | 701                                 | 7  |
| ILHJT.01-5      | 152.92                  | 531.97           | 0.29                                | 0.06690                              | 0.00148 | 1.22252                             | 0.02765 | 0.13253                             | 0.00113 | 835                                  | 46 | 811                                 | 18 | 802                                 | 7  |
| ILHJT.01-6      | 319.30                  | 598.11           | 0.53                                | 0.06859                              | 0.00160 | 0.95835                             | 0.02304 | 0.10133                             | 0.00085 | 886                                  | 48 | 682                                 | 16 | 622                                 | 5  |
| ILHJT.01-7      | 87.84                   | 561.30           | 0.16                                | 0.06887                              | 0.00150 | 1.45518                             | 0.03271 | 0.15326                             | 0.00133 | 895                                  | 45 | 912                                 | 20 | 919                                 | 8  |
| ILHJT.01-8      | 213.48                  | 1020.68          | 0.21                                | 0.06369                              | 0.00138 | 1.05423                             | 0.02353 | 0.12005                             | 0.00106 | 731                                  | 46 | 731                                 | 16 | 731                                 | 6  |
| ILHJT.01-9      | 76.86                   | 387.18           | 0.20                                | 0.06380                              | 0.00156 | 1.18546                             | 0.02997 | 0.13477                             | 0.00112 | 735                                  | 52 | 794                                 | 20 | 815                                 | 7  |
| ILHJT.01-10     | 117.28                  | 505.50           | 0.23                                | 0.05795                              | 0.00140 | 0.61621                             | 0.01537 | 0.07712                             | 0.00068 | 528                                  | 53 | 487                                 | 12 | 479                                 | 4  |
| ILHJT.01-11     | 89.68                   | 506.17           | 0.18                                | 0.06178                              | 0.00139 | 0.91800                             | 0.02112 | 0.10777                             | 0.00084 | 666                                  | 48 | 661                                 | 15 | 660                                 | 5  |
| ILHJT.01-12     | 158.60                  | 888.35           | 0.18                                | 0.05739                              | 0.00129 | 0.61922                             | 0.01418 | 0.07825                             | 0.00063 | 507                                  | 49 | 489                                 | 11 | 486                                 | 4  |
| ILHJT.01-13     | 95.67                   | 301.09           | 0.32                                | 0.06457                              | 0.00159 | 0.91077                             | 0.02309 | 0.10230                             | 0.00082 | 760                                  | 52 | 657                                 | 17 | 628                                 | 5  |
| ILHJT.01-14     | 1323.58                 | 4454.48          | 0.30                                | 0.05682                              | 0.00121 | 0.61629                             | 0.01493 | 0.07866                             | 0.00130 | 485                                  | 47 | 488                                 | 12 | 488                                 | 8  |

|             |        |        |      |         |         |         |         |         |         |     |    |     |    |     |   |
|-------------|--------|--------|------|---------|---------|---------|---------|---------|---------|-----|----|-----|----|-----|---|
| ILHJT.01-15 | 111.83 | 906.08 | 0.12 | 0.05625 | 0.00126 | 0.59525 | 0.01368 | 0.07674 | 0.00073 | 462 | 49 | 474 | 11 | 477 | 5 |
|-------------|--------|--------|------|---------|---------|---------|---------|---------|---------|-----|----|-----|----|-----|---|

| Sample: LHJT-02 | Content (ppm) and ratio |                  |                                     | Isotopic ratio                       |         |                                     |         |                                     |         | Age (Ma)                             |    |                                     |    |                                     |    |
|-----------------|-------------------------|------------------|-------------------------------------|--------------------------------------|---------|-------------------------------------|---------|-------------------------------------|---------|--------------------------------------|----|-------------------------------------|----|-------------------------------------|----|
| Sport           | <sup>232</sup> Th       | <sup>238</sup> U | <sup>232</sup> Th/ <sup>238</sup> U | <sup>207</sup> Pb/ <sup>206</sup> Pb |         | <sup>207</sup> Pb/ <sup>235</sup> U |         | <sup>206</sup> Pb/ <sup>238</sup> U |         | <sup>207</sup> Pb/ <sup>206</sup> Pb |    | <sup>207</sup> Pb/ <sup>235</sup> U |    | <sup>206</sup> Pb/ <sup>238</sup> U |    |
|                 |                         |                  |                                     | Ratio                                | 1σ      | Ratio                               | 1σ      | Ratio                               | 1σ      | Age                                  | 1σ | Age                                 | 1σ | Age                                 | 1σ |
| ILHJT.02-1      | 184.65                  | 533.49           | 0.35                                | 0.05787                              | 0.00091 | 0.62536                             | 0.01050 | 0.07838                             | 0.00057 | 525                                  | 34 | 493                                 | 8  | 486                                 | 4  |
| ILHJT.02-2      | 230.22                  | 553.17           | 0.42                                | 0.05688                              | 0.00119 | 0.62301                             | 0.01345 | 0.07944                             | 0.00052 | 487                                  | 46 | 492                                 | 11 | 493                                 | 3  |
| ILHJT.02-3      | 211.85                  | 461.62           | 0.46                                | 0.05740                              | 0.00163 | 0.61693                             | 0.01794 | 0.07795                             | 0.00052 | 507                                  | 62 | 488                                 | 14 | 484                                 | 3  |
| ILHJT.02-4      | 375.42                  | 655.72           | 0.57                                | 0.05794                              | 0.00091 | 0.62504                             | 0.01051 | 0.07824                             | 0.00053 | 527                                  | 35 | 493                                 | 8  | 486                                 | 3  |
| ILHJT.02-5      | 161.42                  | 548.47           | 0.29                                | 0.06005                              | 0.00086 | 0.64852                             | 0.00990 | 0.07832                             | 0.00057 | 605                                  | 31 | 508                                 | 8  | 486                                 | 4  |
| ILHJT.02-6      | 308.46                  | 763.32           | 0.40                                | 0.05754                              | 0.00083 | 0.62477                             | 0.00925 | 0.07874                             | 0.00056 | 512                                  | 32 | 493                                 | 7  | 489                                 | 3  |
| ILHJT.02-7      | 371.12                  | 682.92           | 0.54                                | 0.05718                              | 0.00093 | 0.61628                             | 0.01027 | 0.07817                             | 0.00051 | 498                                  | 36 | 488                                 | 8  | 485                                 | 3  |
| ILHJT.02-8      | 163.18                  | 387.20           | 0.42                                | 0.05765                              | 0.00133 | 0.61866                             | 0.01482 | 0.07783                             | 0.00055 | 517                                  | 50 | 489                                 | 12 | 483                                 | 3  |
| ILHJT.02-9      | 314.07                  | 654.29           | 0.48                                | 0.05690                              | 0.00089 | 0.60817                             | 0.00984 | 0.07752                             | 0.00053 | 488                                  | 34 | 482                                 | 8  | 481                                 | 3  |
| ILHJT.02-10     | 270.30                  | 665.85           | 0.41                                | 0.05865                              | 0.00126 | 0.61543                             | 0.01352 | 0.07611                             | 0.00049 | 554                                  | 47 | 487                                 | 11 | 473                                 | 3  |
| ILHJT.02-11     | 304.01                  | 654.76           | 0.46                                | 0.05793                              | 0.00091 | 0.61603                             | 0.01015 | 0.07713                             | 0.00050 | 527                                  | 35 | 487                                 | 8  | 479                                 | 3  |
| ILHJT.02-12     | 287.28                  | 753.43           | 0.38                                | 0.05730                              | 0.00076 | 0.61385                             | 0.00853 | 0.07770                             | 0.00051 | 503                                  | 29 | 486                                 | 7  | 482                                 | 3  |
| ILHJT.02-13     | 308.01                  | 821.73           | 0.37                                | 0.05799                              | 0.00074 | 0.61982                             | 0.00837 | 0.07752                             | 0.00053 | 529                                  | 28 | 490                                 | 7  | 481                                 | 3  |
| ILHJT.02-14     | 445.72                  | 881.41           | 0.51                                | 0.05858                              | 0.00076 | 0.63005                             | 0.00848 | 0.07801                             | 0.00051 | 552                                  | 28 | 496                                 | 7  | 484                                 | 3  |
| ILHJT.02-15     | 223.96                  | 803.78           | 0.28                                | 0.05811                              | 0.00084 | 0.62381                             | 0.00947 | 0.07786                             | 0.00055 | 534                                  | 32 | 492                                 | 7  | 483                                 | 3  |
| ILHJT.02-16     | 265.03                  | 675.61           | 0.39                                | 0.05699                              | 0.00090 | 0.61615                             | 0.00998 | 0.07842                             | 0.00051 | 491                                  | 35 | 487                                 | 8  | 487                                 | 3  |
| ILHJT.02-17     | 258.92                  | 566.83           | 0.46                                | 0.05611                              | 0.00095 | 0.61229                             | 0.01071 | 0.07915                             | 0.00051 | 457                                  | 38 | 485                                 | 8  | 491                                 | 3  |
| ILHJT.02-18     | 379.22                  | 745.35           | 0.51                                | 0.05756                              | 0.00087 | 0.61861                             | 0.00974 | 0.07795                             | 0.00050 | 513                                  | 33 | 489                                 | 8  | 484                                 | 3  |
| ILHJT.02-19     | 32.90                   | 523.90           | 0.06                                | 0.06590                              | 0.00108 | 0.77100                             | 0.01328 | 0.08485                             | 0.00056 | 803                                  | 34 | 580                                 | 10 | 525                                 | 3  |
| ILHJT.02-20     | 280.03                  | 562.68           | 0.50                                | 0.06509                              | 0.00100 | 0.70596                             | 0.01095 | 0.07866                             | 0.00051 | 777                                  | 32 | 542                                 | 8  | 488                                 | 3  |
| ILHJT.02-21     | 289.78                  | 685.99           | 0.42                                | 0.06044                              | 0.00088 | 0.67460                             | 0.01012 | 0.08095                             | 0.00052 | 619                                  | 31 | 524                                 | 8  | 502                                 | 3  |
| ILHJT.02-22     | 144.93                  | 437.25           | 0.33                                | 0.05599                              | 0.00161 | 0.60809                             | 0.01823 | 0.07876                             | 0.00054 | 452                                  | 64 | 482                                 | 14 | 489                                 | 3  |

|             |        |        |      |         |         |         |         |         |         |      |    |     |    |     |   |
|-------------|--------|--------|------|---------|---------|---------|---------|---------|---------|------|----|-----|----|-----|---|
| ILHJT.02-23 | 211.28 | 700.00 | 0.30 | 0.05795 | 0.00099 | 0.61997 | 0.01084 | 0.07760 | 0.00050 | 528  | 37 | 490 | 9  | 482 | 3 |
| ILHJT.02-24 | 115.18 | 478.87 | 0.24 | 0.05713 | 0.00126 | 0.61949 | 0.01423 | 0.07865 | 0.00051 | 496  | 49 | 490 | 11 | 488 | 3 |
| ILHJT.02-25 | 136.82 | 389.31 | 0.35 | 0.05682 | 0.00126 | 0.61982 | 0.01416 | 0.07911 | 0.00051 | 485  | 49 | 490 | 11 | 491 | 3 |
| ILHJT.02-26 | 118.94 | 411.81 | 0.29 | 0.05703 | 0.00112 | 0.62743 | 0.01281 | 0.07979 | 0.00051 | 493  | 43 | 494 | 10 | 495 | 3 |
| ILHJT.02-27 | 277.61 | 578.81 | 0.48 | 0.05850 | 0.00095 | 0.65046 | 0.01106 | 0.08064 | 0.00051 | 549  | 36 | 509 | 9  | 500 | 3 |
| ILHJT.02-28 | 130.22 | 606.74 | 0.21 | 0.06370 | 0.00094 | 0.79380 | 0.01231 | 0.09038 | 0.00061 | 732  | 31 | 593 | 9  | 558 | 4 |
| ILHJT.02-29 | 362.18 | 741.28 | 0.49 | 0.05863 | 0.00096 | 0.62810 | 0.01045 | 0.07770 | 0.00051 | 553  | 36 | 495 | 8  | 482 | 3 |
| ILHJT.02-30 | 171.79 | 501.33 | 0.34 | 0.05734 | 0.00099 | 0.61270 | 0.01087 | 0.07749 | 0.00050 | 505  | 38 | 485 | 9  | 481 | 3 |
| ILHJT.02-31 | 62.42  | 200.46 | 0.31 | 0.09629 | 0.00498 | 1.03365 | 0.05867 | 0.07786 | 0.00091 | 1553 | 97 | 721 | 41 | 483 | 6 |

| Sample: LZK02-01 | Content (ppm) and ratio |                  |                                     | Isotopic ratio                       |         |                                     |         |                                     |         | Age (Ma)                            |    |                                     |    |
|------------------|-------------------------|------------------|-------------------------------------|--------------------------------------|---------|-------------------------------------|---------|-------------------------------------|---------|-------------------------------------|----|-------------------------------------|----|
| Sport            | <sup>232</sup> Th       | <sup>238</sup> U | <sup>232</sup> Th/ <sup>238</sup> U | <sup>207</sup> Pb/ <sup>206</sup> Pb |         | <sup>207</sup> Pb/ <sup>235</sup> U |         | <sup>206</sup> Pb/ <sup>238</sup> U |         | <sup>207</sup> Pb/ <sup>235</sup> U |    | <sup>206</sup> Pb/ <sup>238</sup> U |    |
|                  |                         |                  |                                     | Ratio                                | 1σ      | Ratio                               | 1σ      | Ratio                               | 1σ      | Age                                 | 1σ | Age                                 | 1σ |
| ILZK02.01-1      | 542.27                  | 738.96           | 0.73                                | 0.05652                              | 0.00086 | 0.57114                             | 0.00877 | 0.07329                             | 0.00074 | 459                                 | 7  | 456                                 | 5  |
| ILZK02.01-2      | 253.55                  | 388.20           | 0.65                                | 0.05675                              | 0.00126 | 0.56040                             | 0.01327 | 0.07162                             | 0.00123 | 452                                 | 11 | 446                                 | 8  |
| ILZK02.01-3      | 459.89                  | 515.99           | 0.89                                | 0.05453                              | 0.00095 | 0.57151                             | 0.01001 | 0.07601                             | 0.00085 | 459                                 | 8  | 472                                 | 5  |
| ILZK02.01-4      | 417.60                  | 569.84           | 0.73                                | 0.05674                              | 0.00096 | 0.58687                             | 0.01021 | 0.07502                             | 0.00058 | 469                                 | 8  | 466                                 | 4  |
| ILZK02.01-5      | 389.57                  | 616.62           | 0.63                                | 0.05535                              | 0.00082 | 0.55929                             | 0.00878 | 0.07329                             | 0.00069 | 451                                 | 7  | 456                                 | 4  |
| ILZK02.01-6      | 302.33                  | 402.08           | 0.75                                | 0.05894                              | 0.00111 | 0.60332                             | 0.01124 | 0.07424                             | 0.00089 | 479                                 | 9  | 462                                 | 6  |
| ILZK02.01-7      | 328.43                  | 491.58           | 0.67                                | 0.05547                              | 0.00098 | 0.55271                             | 0.01020 | 0.07227                             | 0.00067 | 447                                 | 8  | 450                                 | 4  |
| ILZK02.01-8      | 803.60                  | 839.89           | 0.96                                | 0.05832                              | 0.00078 | 0.60450                             | 0.00920 | 0.07518                             | 0.00114 | 480                                 | 7  | 467                                 | 7  |
| ILZK02.01-9      | 453.99                  | 650.38           | 0.70                                | 0.05662                              | 0.00081 | 0.58198                             | 0.00937 | 0.07455                             | 0.00094 | 466                                 | 7  | 464                                 | 6  |
| ILZK02.01-10     | 556.23                  | 655.08           | 0.85                                | 0.05674                              | 0.00087 | 0.54963                             | 0.00866 | 0.07026                             | 0.00048 | 445                                 | 7  | 438                                 | 3  |
| ILZK02.01-11     | 470.24                  | 584.27           | 0.80                                | 0.05614                              | 0.00087 | 0.56624                             | 0.00961 | 0.07315                             | 0.00086 | 456                                 | 8  | 455                                 | 5  |
| ILZK02.01-12     | 581.76                  | 798.30           | 0.73                                | 0.05679                              | 0.00067 | 0.58660                             | 0.00768 | 0.07492                             | 0.00097 | 469                                 | 6  | 466                                 | 6  |
| ILZK02.01-13     | 831.56                  | 1013.53          | 0.82                                | 0.05777                              | 0.00064 | 0.59157                             | 0.00701 | 0.07427                             | 0.00079 | 472                                 | 6  | 462                                 | 5  |
| ILZK02.01-14     | 339.79                  | 468.70           | 0.72                                | 0.05556                              | 0.00105 | 0.55818                             | 0.01089 | 0.07287                             | 0.00083 | 450                                 | 9  | 453                                 | 5  |
| ILZK02.01-15     | 319.82                  | 482.31           | 0.66                                | 0.05710                              | 0.00094 | 0.58771                             | 0.01018 | 0.07465                             | 0.00061 | 469                                 | 8  | 464                                 | 4  |
| ILZK02.01-16     | 183.69                  | 322.03           | 0.57                                | 0.05732                              | 0.00145 | 0.63166                             | 0.01649 | 0.07992                             | 0.00086 | 497                                 | 13 | 496                                 | 5  |
| ILZK02.01-17     | 202.43                  | 345.61           | 0.59                                | 0.05695                              | 0.00160 | 0.58763                             | 0.01796 | 0.07483                             | 0.00067 | 469                                 | 14 | 465                                 | 4  |
| ILZK02.01-18     | 329.21                  | 488.18           | 0.67                                | 0.05621                              | 0.00115 | 0.57686                             | 0.01197 | 0.07443                             | 0.00131 | 462                                 | 10 | 463                                 | 8  |
| ILZK02.01-19     | 216.39                  | 382.85           | 0.57                                | 0.05670                              | 0.00120 | 0.58512                             | 0.01297 | 0.07485                             | 0.00060 | 468                                 | 10 | 465                                 | 4  |
| ILZK02.01-20     | 433.74                  | 673.14           | 0.64                                | 0.05670                              | 0.00073 | 0.58265                             | 0.00793 | 0.07453                             | 0.00071 | 466                                 | 6  | 463                                 | 4  |
| ILZK02.01-21     | 206.46                  | 338.15           | 0.61                                | 0.06008                              | 0.00161 | 0.61410                             | 0.01677 | 0.07414                             | 0.00104 | 486                                 | 13 | 461                                 | 6  |
| ILZK02.01-22     | 401.84                  | 573.17           | 0.70                                | 0.05676                              | 0.00077 | 0.58358                             | 0.00870 | 0.07457                             | 0.00095 | 467                                 | 7  | 464                                 | 6  |

|              |        |        |      |         |         |         |         |         |         |     |   |     |   |
|--------------|--------|--------|------|---------|---------|---------|---------|---------|---------|-----|---|-----|---|
| ILZK02.01-23 | 403.93 | 589.69 | 0.68 | 0.05660 | 0.00088 | 0.58558 | 0.00941 | 0.07503 | 0.00102 | 468 | 8 | 466 | 6 |
| ILZK02.01-24 | 901.05 | 940.25 | 0.96 | 0.05867 | 0.00076 | 0.60218 | 0.00883 | 0.07444 | 0.00074 | 479 | 7 | 463 | 5 |
| ILZK02.01-25 | 429.29 | 547.98 | 0.78 | 0.05666 | 0.00116 | 0.56721 | 0.01143 | 0.07260 | 0.00126 | 456 | 9 | 452 | 8 |
| ILZK02.01-26 | 635.57 | 710.63 | 0.89 | 0.05648 | 0.00075 | 0.57854 | 0.00795 | 0.07429 | 0.00086 | 464 | 6 | 462 | 5 |
| ILZK02.01-27 | 711.83 | 832.92 | 0.85 | 0.05643 | 0.00069 | 0.57583 | 0.00719 | 0.07400 | 0.00069 | 462 | 6 | 460 | 4 |
| ILZK02.01-28 | 669.90 | 752.92 | 0.89 | 0.05373 | 0.00087 | 0.55546 | 0.00977 | 0.07498 | 0.00066 | 449 | 8 | 466 | 4 |
| ILZK02.01-29 | 671.11 | 835.24 | 0.80 | 0.05738 | 0.00100 | 0.62033 | 0.01155 | 0.07841 | 0.00074 | 490 | 9 | 487 | 5 |
| ILZK02.01-30 | 462.81 | 673.78 | 0.69 | 0.05459 | 0.00075 | 0.54704 | 0.00802 | 0.07268 | 0.00085 | 443 | 6 | 452 | 5 |
| ILZK02.01-31 | 593.62 | 683.27 | 0.87 | 0.05607 | 0.00077 | 0.57969 | 0.01010 | 0.07498 | 0.00120 | 464 | 8 | 466 | 7 |
| ILZK02.01-32 | 414.78 | 637.16 | 0.65 | 0.05467 | 0.00085 | 0.55975 | 0.00948 | 0.07426 | 0.00092 | 451 | 8 | 462 | 6 |



| Sample: LZK02-02 | Content (ppm) and ratio |                  |                                     | Isotopic ratio                       |         |                                     |         |                                     |         | Age (Ma)                            |    |                                     |    |
|------------------|-------------------------|------------------|-------------------------------------|--------------------------------------|---------|-------------------------------------|---------|-------------------------------------|---------|-------------------------------------|----|-------------------------------------|----|
| Sport            | <sup>232</sup> Th       | <sup>238</sup> U | <sup>232</sup> Th/ <sup>238</sup> U | <sup>207</sup> Pb/ <sup>206</sup> Pb |         | <sup>207</sup> Pb/ <sup>235</sup> U |         | <sup>206</sup> Pb/ <sup>238</sup> U |         | <sup>207</sup> Pb/ <sup>235</sup> U |    | <sup>206</sup> Pb/ <sup>238</sup> U |    |
|                  |                         |                  |                                     | Ratio                                | 1σ      | Ratio                               | 1σ      | Ratio                               | 1σ      | Age                                 | 1σ | Age                                 | 1σ |
| ILZK02.02-1      | 910.84                  | 1273.48          | 0.72                                | 0.05647                              | 0.00101 | 0.60275                             | 0.01346 | 0.07742                             | 0.00079 | 479                                 | 11 | 481                                 | 5  |
| ILZK02.02-2      | 1154.28                 | 1174.09          | 0.98                                | 0.05856                              | 0.00102 | 0.71409                             | 0.01582 | 0.08843                             | 0.00087 | 547                                 | 12 | 546                                 | 5  |
| ILZK02.02-3      | 741.54                  | 1024.48          | 0.72                                | 0.05799                              | 0.00154 | 0.63762                             | 0.02245 | 0.07975                             | 0.00085 | 501                                 | 18 | 495                                 | 5  |
| ILZK02.02-4      | 968.09                  | 1427.80          | 0.68                                | 0.05695                              | 0.00109 | 0.60650                             | 0.01427 | 0.07724                             | 0.00076 | 481                                 | 11 | 480                                 | 5  |
| ILZK02.02-5      | 1165.96                 | 1181.51          | 0.99                                | 0.05699                              | 0.00103 | 0.60569                             | 0.01364 | 0.07708                             | 0.00075 | 481                                 | 11 | 479                                 | 5  |
| ILZK02.02-6      | 897.27                  | 1039.94          | 0.86                                | 0.05791                              | 0.00103 | 0.63727                             | 0.01445 | 0.07981                             | 0.00079 | 501                                 | 11 | 495                                 | 5  |
| ILZK02.02-7      | 809.46                  | 764.71           | 1.06                                | 0.05916                              | 0.00121 | 0.73985                             | 0.01830 | 0.09070                             | 0.00089 | 562                                 | 14 | 560                                 | 5  |
| ILZK02.02-9      | 403.07                  | 594.62           | 0.68                                | 0.05677                              | 0.00115 | 0.60494                             | 0.01498 | 0.07728                             | 0.00076 | 480                                 | 12 | 480                                 | 5  |
| ILZK02.02-10     | 588.11                  | 810.64           | 0.73                                | 0.05680                              | 0.00118 | 0.60641                             | 0.01559 | 0.07744                             | 0.00076 | 481                                 | 12 | 481                                 | 5  |
| ILZK02.02-11     | 618.26                  | 763.35           | 0.81                                | 0.05660                              | 0.00105 | 0.60415                             | 0.01418 | 0.07741                             | 0.00076 | 480                                 | 11 | 481                                 | 5  |
| ILZK02.02-12     | 796.58                  | 886.20           | 0.90                                | 0.06002                              | 0.00111 | 0.59777                             | 0.01364 | 0.07223                             | 0.00070 | 476                                 | 11 | 450                                 | 4  |
| ILZK02.02-13     | 581.09                  | 694.60           | 0.84                                | 0.05677                              | 0.00109 | 0.60529                             | 0.01441 | 0.07733                             | 0.00077 | 481                                 | 11 | 480                                 | 5  |
| ILZK02.02-14     | 626.29                  | 774.46           | 0.81                                | 0.05645                              | 0.00106 | 0.60256                             | 0.01397 | 0.07742                             | 0.00076 | 479                                 | 11 | 481                                 | 5  |
| ILZK02.02-15     | 871.22                  | 908.14           | 0.96                                | 0.05658                              | 0.00101 | 0.60341                             | 0.01371 | 0.07735                             | 0.00076 | 479                                 | 11 | 480                                 | 5  |
| ILZK02.02-16     | 821.35                  | 798.21           | 1.03                                | 0.05674                              | 0.00107 | 0.60591                             | 0.01433 | 0.07744                             | 0.00076 | 481                                 | 11 | 481                                 | 5  |
| ILZK02.02-17     | 950.84                  | 878.41           | 1.08                                | 0.05660                              | 0.00101 | 0.59984                             | 0.01332 | 0.07687                             | 0.00076 | 477                                 | 11 | 477                                 | 5  |
| ILZK02.02-18     | 316.00                  | 457.56           | 0.69                                | 0.05713                              | 0.00114 | 0.60768                             | 0.01515 | 0.07715                             | 0.00076 | 482                                 | 12 | 479                                 | 5  |
| ILZK02.02-19     | 61.58                   | 980.63           | 0.06                                | 0.05532                              | 0.00107 | 0.33986                             | 0.00883 | 0.04456                             | 0.00057 | 297                                 | 8  | 281                                 | 4  |
| ILZK02.02-20     | 633.82                  | 743.89           | 0.85                                | 0.05654                              | 0.00105 | 0.60276                             | 0.01420 | 0.07732                             | 0.00077 | 479                                 | 11 | 480                                 | 5  |
| ILZK02.02-21     | 569.65                  | 627.57           | 0.91                                | 0.05674                              | 0.00115 | 0.60575                             | 0.01484 | 0.07742                             | 0.00076 | 481                                 | 12 | 481                                 | 5  |
| ILZK02.02-22     | 694.00                  | 870.73           | 0.80                                | 0.05684                              | 0.00105 | 0.60347                             | 0.01412 | 0.07701                             | 0.00076 | 479                                 | 11 | 478                                 | 5  |
| ILZK02.02-23     | 527.77                  | 679.34           | 0.78                                | 0.05764                              | 0.00105 | 0.63171                             | 0.01458 | 0.07948                             | 0.00078 | 497                                 | 11 | 493                                 | 5  |

|              |        |        |      |         |         |         |         |         |         |     |    |     |   |
|--------------|--------|--------|------|---------|---------|---------|---------|---------|---------|-----|----|-----|---|
| ILZK02.02-24 | 493.43 | 576.60 | 0.86 | 0.05873 | 0.00114 | 0.63731 | 0.01552 | 0.07870 | 0.00079 | 501 | 12 | 488 | 5 |
| ILZK02.02-25 | 732.15 | 870.61 | 0.84 | 0.05865 | 0.00127 | 0.63662 | 0.01716 | 0.07873 | 0.00079 | 500 | 13 | 489 | 5 |
| ILZK02.02-27 | 462.13 | 618.07 | 0.75 | 0.05776 | 0.00191 | 0.63542 | 0.02497 | 0.07978 | 0.00083 | 499 | 20 | 495 | 5 |
| ILZK02.02-28 | 326.93 | 455.51 | 0.72 | 0.05880 | 0.00126 | 0.63457 | 0.01617 | 0.07827 | 0.00077 | 499 | 13 | 486 | 5 |
| ILZK02.02-29 | 690.79 | 685.40 | 1.01 | 0.05804 | 0.00114 | 0.71231 | 0.01724 | 0.08901 | 0.00087 | 546 | 13 | 550 | 5 |
| ILZK02.02-30 | 658.24 | 783.59 | 0.84 | 0.06005 | 0.00189 | 0.72712 | 0.03252 | 0.08782 | 0.00123 | 555 | 25 | 543 | 8 |

| Sample: LAZK104-1 | Content (ppm) and ratio |          |             | Isotopic ratio                                      |        |                                                    |        |                                                    |        | Age (Ma)                                            |       |                                                    |      |                                                    |      |
|-------------------|-------------------------|----------|-------------|-----------------------------------------------------|--------|----------------------------------------------------|--------|----------------------------------------------------|--------|-----------------------------------------------------|-------|----------------------------------------------------|------|----------------------------------------------------|------|
|                   | <i>Th</i>               | <i>U</i> | <i>Th/U</i> | <sup>207</sup> <i>Pb</i> / <sup>206</sup> <i>Pb</i> | 1s     | <sup>207</sup> <i>Pb</i> / <sup>235</sup> <i>U</i> | 1s     | <sup>206</sup> <i>Pb</i> / <sup>238</sup> <i>U</i> | 1s     | <sup>207</sup> <i>Pb</i> / <sup>206</sup> <i>Pb</i> | 1s    | <sup>207</sup> <i>Pb</i> / <sup>235</sup> <i>U</i> | 1s   | <sup>206</sup> <i>Pb</i> / <sup>238</sup> <i>U</i> | 1s   |
| LAZK104-1-01      | 1050                    | 1133     | 0.93        | 0.0502                                              | 0.0068 | 0.4784                                             | 0.1129 | 0.0733                                             | 0.0018 | 211                                                 | 103   | 397                                                | 25.8 | 456                                                | 11.0 |
| LAZK104-1-02      | 552                     | 834      | 0.66        | 0.0533                                              | 0.0057 | 0.5189                                             | 0.0938 | 0.0739                                             | 0.0015 | 339                                                 | 79.6  | 424                                                | 20.9 | 459                                                | 8.8  |
| LAZK104-1-03      | 446                     | 708      | 0.63        | 0.0544                                              | 0.0043 | 0.5321                                             | 0.0695 | 0.0731                                             | 0.0011 | 391                                                 | 63.9  | 433                                                | 15.4 | 455                                                | 6.7  |
| LAZK104-1-04      | 795                     | 928      | 0.86        | 0.0544                                              | 0.0030 | 0.5399                                             | 0.0462 | 0.0734                                             | 0.0008 | 387                                                 | 40.7  | 438                                                | 10.1 | 456                                                | 5.1  |
| LAZK104-1-05      | 793                     | 1069     | 0.74        | 0.0556                                              | 0.0020 | 0.5594                                             | 0.0264 | 0.0736                                             | 0.0006 | 439                                                 | 25.9  | 451                                                | 5.7  | 458                                                | 3.9  |
| LAZK104-1-06      | 645                     | 775      | 0.83        | 0.0623                                              | 0.0017 | 0.6305                                             | 0.0187 | 0.0733                                             | 0.0005 | 683                                                 | 18.5  | 496                                                | 3.9  | 456                                                | 3.3  |
| LAZK104-1-07      | 852                     | 1001     | 0.85        | 0.0593                                              | 0.0013 | 0.6049                                             | 0.0147 | 0.0739                                             | 0.0005 | 576                                                 | 16.7  | 480                                                | 3.1  | 459                                                | 3.3  |
| LAZK104-1-08      | 619                     | 864      | 0.72        | 0.0581                                              | 0.0013 | 0.5893                                             | 0.0130 | 0.0736                                             | 0.0005 | 532                                                 | 16.7  | 470                                                | 2.8  | 458                                                | 3.3  |
| LAZK104-1-09      | 967                     | 1215     | 0.80        | 0.0587                                              | 0.0014 | 0.5967                                             | 0.0139 | 0.0736                                             | 0.0007 | 567                                                 | 18.5  | 475                                                | 3.0  | 458                                                | 4.0  |
| LAZK104-1-10      | 507                     | 647      | 0.78        | 0.0593                                              | 0.0017 | 0.6067                                             | 0.0167 | 0.0742                                             | 0.0006 | 589                                                 | 15.7  | 481                                                | 3.5  | 461                                                | 3.4  |
| LAZK104-1-11      | 546                     | 801      | 0.68        | 0.0602                                              | 0.0020 | 0.6170                                             | 0.0204 | 0.0743                                             | 0.0005 | 609                                                 | 22.2  | 488                                                | 4.3  | 462                                                | 2.9  |
| LAZK104-1-12      | 479                     | 754      | 0.64        | 0.0571                                              | 0.0014 | 0.5852                                             | 0.0139 | 0.0743                                             | 0.0005 | 494                                                 | 21.3  | 468                                                | 3.0  | 462                                                | 2.9  |
| LAZK104-1-13      | 1010                    | 1139     | 0.89        | 0.0566                                              | 0.0013 | 0.5720                                             | 0.0127 | 0.0733                                             | 0.0004 | 476                                                 | 21.3  | 459                                                | 2.7  | 456                                                | 2.6  |
| LAZK104-1-14      | 923                     | 1117     | 0.83        | 0.0555                                              | 0.0013 | 0.5628                                             | 0.0131 | 0.0736                                             | 0.0006 | 432                                                 | 21.3  | 453                                                | 2.8  | 458                                                | 3.5  |
| LAZK104-1-15      | 528                     | 789      | 0.67        | 0.0547                                              | 0.0015 | 0.5628                                             | 0.0153 | 0.0746                                             | 0.0006 | 467                                                 | 15.7  | 453                                                | 3.3  | 464                                                | 4.0  |
| LAZK104-1-16      | 639                     | 917      | 0.70        | 0.0547                                              | 0.0014 | 0.5623                                             | 0.0147 | 0.0745                                             | 0.0005 | 467                                                 | 18.5  | 453                                                | 3.2  | 463                                                | 2.9  |
| LAZK104-1-17      | 886                     | 1015     | 0.87        | 0.0551                                              | 0.0013 | 0.5606                                             | 0.0133 | 0.0737                                             | 0.0005 | 417                                                 | -15.7 | 452                                                | 2.9  | 459                                                | 3.2  |
| LAZK104-1-18      | 641                     | 901      | 0.71        | 0.0554                                              | 0.0013 | 0.5641                                             | 0.0135 | 0.0739                                             | 0.0006 | 428                                                 | 23.1  | 454                                                | 2.9  | 459                                                | 3.6  |
| LAZK104-1-19      | 484                     | 727      | 0.67        | 0.0575                                              | 0.0016 | 0.5922                                             | 0.0159 | 0.0746                                             | 0.0006 | 522                                                 | 15.7  | 472                                                | 3.4  | 464                                                | 3.8  |
| LAZK104-1-20      | 678                     | 911      | 0.74        | 0.0564                                              | 0.0016 | 0.5803                                             | 0.0178 | 0.0746                                             | 0.0010 | 478                                                 | 22.2  | 465                                                | 3.8  | 464                                                | 5.8  |
| LAZK104-1-21      | 796                     | 906      | 0.88        | 0.0575                                              | 0.0016 | 0.5841                                             | 0.0175 | 0.0737                                             | 0.0007 | 509                                                 | 22.2  | 467                                                | 3.8  | 458                                                | 4.1  |
| LAZK104-1-22      | 903                     | 1060     | 0.85        | 0.0561                                              | 0.0014 | 0.5713                                             | 0.0144 | 0.0738                                             | 0.0006 | 454                                                 | 18.5  | 459                                                | 3.1  | 459                                                | 3.4  |

|              |      |      |      |        |        |        |        |        |        |     |      |     |     |     |     |
|--------------|------|------|------|--------|--------|--------|--------|--------|--------|-----|------|-----|-----|-----|-----|
| LAZK104-1-23 | 1111 | 1157 | 0.96 | 0.0556 | 0.0013 | 0.5704 | 0.0140 | 0.0743 | 0.0008 | 439 | 16.7 | 458 | 3.0 | 462 | 4.8 |
| LAZK104-1-24 | 591  | 838  | 0.71 | 0.0550 | 0.0015 | 0.5619 | 0.0149 | 0.0741 | 0.0006 | 409 | 20.4 | 453 | 3.2 | 461 | 3.8 |
| LAZK104-1-25 | 730  | 832  | 0.88 | 0.0546 | 0.0016 | 0.5584 | 0.0166 | 0.0742 | 0.0009 | 394 | 22.2 | 451 | 3.6 | 461 | 5.6 |
| LAZK104-1-26 | 694  | 885  | 0.78 | 0.0542 | 0.0016 | 0.5583 | 0.0159 | 0.0747 | 0.0008 | 376 | 15.7 | 450 | 3.5 | 464 | 5.0 |
| LAZK104-1-27 | 587  | 768  | 0.76 | 0.0553 | 0.0015 | 0.5674 | 0.0151 | 0.0744 | 0.0007 | 433 | 25.0 | 456 | 3.3 | 462 | 4.2 |
| LAZK104-1-28 | 883  | 898  | 0.98 | 0.0550 | 0.0012 | 0.5588 | 0.0123 | 0.0737 | 0.0006 | 409 | 16.7 | 451 | 2.7 | 458 | 3.9 |
| LAZK104-1-29 | 641  | 850  | 0.75 | 0.0563 | 0.0013 | 0.5754 | 0.0142 | 0.0741 | 0.0007 | 465 | 12.0 | 462 | 3.1 | 461 | 4.5 |
| LAZK104-1-30 | 665  | 834  | 0.80 | 0.0564 | 0.0014 | 0.5777 | 0.0147 | 0.0743 | 0.0007 | 465 | 13.9 | 463 | 3.2 | 462 | 4.4 |

| Sample: LAZK104-2 | Content (ppm) and ratio |          |             | Isotopic ratio                                      |        |                                                    |        |                                                    |        | Age (Ma)                                            |          |                                                    |     |                                                    |     |
|-------------------|-------------------------|----------|-------------|-----------------------------------------------------|--------|----------------------------------------------------|--------|----------------------------------------------------|--------|-----------------------------------------------------|----------|----------------------------------------------------|-----|----------------------------------------------------|-----|
|                   | <i>Th</i>               | <i>U</i> | <i>Th/U</i> | <sup>207</sup> <i>Pb</i> / <sup>206</sup> <i>Pb</i> | 1σ     | <sup>207</sup> <i>Pb</i> / <sup>235</sup> <i>U</i> | 1σ     | <sup>206</sup> <i>Pb</i> / <sup>238</sup> <i>U</i> | 1σ     | <sup>207</sup> <i>Pb</i> / <sup>206</sup> <i>Pb</i> | 1σ       | <sup>207</sup> <i>Pb</i> / <sup>235</sup> <i>U</i> | 1σ  | <sup>206</sup> <i>Pb</i> / <sup>238</sup> <i>U</i> | 1σ  |
| LAIZK104-2-01     | 598                     | 900      | 0.67        | 0.0565                                              | 0.0015 | 0.5724                                             | 0.0151 | 0.0735                                             | 0.0008 | 472                                                 | 23.1     | 460                                                | 3.3 | 457                                                | 4.7 |
| LAIZK104-2-02     | 966                     | 1217     | 0.79        | 0.0567                                              | 0.0013 | 0.5691                                             | 0.0131 | 0.0728                                             | 0.0006 | 480                                                 | 16.7     | 457                                                | 2.8 | 453                                                | 3.8 |
| LAIZK104-2-03     | 3016                    | 2810     | 1.07        | 0.0561                                              | 0.0011 | 0.5675                                             | 0.0118 | 0.0733                                             | 0.0005 | 457                                                 | 14.8     | 456                                                | 2.6 | 456                                                | 3.1 |
| LAIZK104-2-04     | 1355                    | 1545     | 0.88        | 0.0575                                              | 0.0014 | 0.5879                                             | 0.0141 | 0.0741                                             | 0.0004 | 509                                                 | 16.7     | 470                                                | 3.0 | 461                                                | 2.5 |
| LAIZK104-2-05     | 1115                    | 1158     | 0.96        | 0.0597                                              | 0.0016 | 0.5960                                             | 0.0201 | 0.0722                                             | 0.0010 | 591                                                 | 18.5     | 475                                                | 4.3 | 449                                                | 6.3 |
| LAIZK104-2-06     | 1254                    | 1192     | 1.05        | 0.0611                                              | 0.0017 | 0.6204                                             | 0.0233 | 0.0734                                             | 0.0012 | 643                                                 | 15.7     | 490                                                | 4.9 | 457                                                | 7.2 |
| LAIZK104-2-07     | 826                     | 1045     | 0.79        | 0.0687                                              | 0.0019 | 0.7026                                             | 0.0188 | 0.0741                                             | 0.0006 | 900                                                 | 18.5     | 540                                                | 3.8 | 461                                                | 3.4 |
| LAIZK104-2-08     | 1001                    | 1127     | 0.89        | 0.0619                                              | 0.0018 | 0.6341                                             | 0.0221 | 0.0740                                             | 0.0007 | 672                                                 | 22.2     | 499                                                | 4.6 | 460                                                | 4.4 |
| LAIZK104-2-09     | 848                     | 1121     | 0.76        | 0.0556                                              | 0.0014 | 0.5679                                             | 0.0138 | 0.0740                                             | 0.0005 | 435                                                 | 18.5     | 457                                                | 3.0 | 460                                                | 3.3 |
| LAIZK104-2-10     | 867                     | 974      | 0.89        | 0.0551                                              | 0.0015 | 0.5567                                             | 0.0146 | 0.0732                                             | 0.0006 | 417                                                 | 20.3675  | 449                                                | 3.2 | 455                                                | 3.4 |
| LAIZK104-2-11     | 744                     | 900      | 0.83        | 0.0551                                              | 0.0016 | 0.5598                                             | 0.0153 | 0.0736                                             | 0.0006 | 417                                                 | 22.2     | 451                                                | 3.3 | 458                                                | 3.9 |
| LAIZK104-2-12     | 1221                    | 1231     | 0.99        | 0.0552                                              | 0.0013 | 0.5600                                             | 0.0132 | 0.0735                                             | 0.0006 | 420                                                 | -13.8875 | 452                                                | 2.9 | 457                                                | 3.5 |
| LAIZK104-2-13     | 2128                    | 1842     | 1.16        | 0.0544                                              | 0.0012 | 0.5486                                             | 0.0125 | 0.0731                                             | 0.0006 | 387                                                 | 49.1     | 444                                                | 2.7 | 455                                                | 3.6 |
| LAIZK104-2-14     | 1277                    | 1436     | 0.89        | 0.0559                                              | 0.0014 | 0.5700                                             | 0.0143 | 0.0738                                             | 0.0006 | 450                                                 | 23.1     | 458                                                | 3.1 | 459                                                | 3.7 |
| LAIZK104-2-15     | 766                     | 760      | 1.01        | 0.0637                                              | 0.0021 | 0.6497                                             | 0.0204 | 0.0739                                             | 0.0006 | 731                                                 | 22.2     | 508                                                | 4.2 | 460                                                | 3.5 |
| LAIZK104-2-16     | 878                     | 1052     | 0.83        | 0.0561                                              | 0.0016 | 0.5720                                             | 0.0157 | 0.0739                                             | 0.0007 | 457                                                 | 20.4     | 459                                                | 3.4 | 459                                                | 4.1 |
| LAIZK104-2-17     | 1044                    | 1135     | 0.92        | 0.0599                                              | 0.0019 | 0.6055                                             | 0.0210 | 0.0731                                             | 0.0006 | 598                                                 | 22.2     | 481                                                | 4.4 | 455                                                | 3.6 |
| LAIZK104-2-18     | 1056                    | 1090     | 0.97        | 0.0545                                              | 0.0013 | 0.5477                                             | 0.0132 | 0.0729                                             | 0.0007 | 391                                                 | 18.5     | 444                                                | 2.9 | 454                                                | 4.0 |
| LAIZK104-2-19     | 1167                    | 1162     | 1.00        | 0.0550                                              | 0.0014 | 0.5541                                             | 0.0142 | 0.0730                                             | 0.0007 | 413                                                 | 18.5     | 448                                                | 3.1 | 454                                                | 4.5 |
| LAIZK104-2-20     | 758                     | 857      | 0.88        | 0.0545                                              | 0.0016 | 0.5516                                             | 0.0165 | 0.0733                                             | 0.0009 | 394                                                 | 20.4     | 446                                                | 3.6 | 456                                                | 5.3 |
| LAIZK104-2-21     | 951                     | 818      | 1.16        | 0.0572                                              | 0.0016 | 0.5691                                             | 0.0171 | 0.0721                                             | 0.0007 | 498                                                 | 22.2     | 457                                                | 3.7 | 449                                                | 4.4 |
| LAIZK104-2-22     | 1503                    | 1522     | 0.99        | 0.0602                                              | 0.0015 | 0.5526                                             | 0.0146 | 0.0665                                             | 0.0005 | 609                                                 | 18.5     | 447                                                | 3.2 | 415                                                | 3.1 |

|               |     |      |      |        |        |        |        |        |        |     |      |     |     |     |     |
|---------------|-----|------|------|--------|--------|--------|--------|--------|--------|-----|------|-----|-----|-----|-----|
| LAIZK104-2-23 | 928 | 1076 | 0.86 | 0.0573 | 0.0014 | 0.5811 | 0.0147 | 0.0735 | 0.0005 | 502 | 18.5 | 465 | 3.2 | 457 | 2.9 |
| LAIZK104-2-24 | 881 | 809  | 1.09 | 0.0641 | 0.0024 | 0.6477 | 0.0236 | 0.0733 | 0.0007 | 746 | 25.9 | 507 | 4.9 | 456 | 4.4 |
| LAIZK104-2-25 | 498 | 705  | 0.71 | 0.0580 | 0.0019 | 0.5893 | 0.0196 | 0.0737 | 0.0008 | 532 | 24.1 | 470 | 4.2 | 458 | 4.7 |
| LAIZK104-2-26 | 492 | 637  | 0.77 | 0.0587 | 0.0020 | 0.5965 | 0.0203 | 0.0737 | 0.0006 | 567 | 25.9 | 475 | 4.3 | 458 | 3.7 |
| LAIZK104-2-27 | 911 | 1149 | 0.79 | 0.0634 | 0.0018 | 0.6475 | 0.0196 | 0.0740 | 0.0007 | 722 | 20.4 | 507 | 4.0 | 460 | 4.1 |
| LAIZK104-2-28 | 571 | 720  | 0.79 | 0.0578 | 0.0016 | 0.5895 | 0.0165 | 0.0740 | 0.0005 | 524 | 20.4 | 471 | 3.5 | 460 | 3.0 |
| LAIZK104-2-29 | 480 | 675  | 0.71 | 0.0583 | 0.0021 | 0.5912 | 0.0208 | 0.0736 | 0.0004 | 539 | 21.3 | 472 | 4.4 | 458 | 2.6 |
| LAIZK104-2-30 | 507 | 626  | 0.81 | 0.0557 | 0.0018 | 0.5582 | 0.0188 | 0.0727 | 0.0006 | 439 | 25.9 | 450 | 4.1 | 453 | 3.9 |
| LAIZK104-2-31 | 580 | 755  | 0.77 | 0.0573 | 0.0019 | 0.5742 | 0.0189 | 0.0727 | 0.0006 | 502 | 24.1 | 461 | 4.1 | 452 | 3.7 |
| LAIZK104-2-32 | 593 | 747  | 0.79 | 0.0576 | 0.0018 | 0.5766 | 0.0174 | 0.0726 | 0.0005 | 522 | 50.0 | 462 | 3.8 | 452 | 3.1 |
| LAIZK104-2-33 | 411 | 515  | 0.80 | 0.0564 | 0.0017 | 0.5691 | 0.0174 | 0.0732 | 0.0005 | 478 | 28.7 | 457 | 3.8 | 455 | 3.1 |
| LAIZK104-2-34 | 458 | 582  | 0.79 | 0.0574 | 0.0020 | 0.5835 | 0.0203 | 0.0737 | 0.0007 | 506 | 25.9 | 467 | 4.3 | 459 | 4.6 |
| LAIZK104-2-35 | 463 | 548  | 0.84 | 0.0590 | 0.0023 | 0.5998 | 0.0234 | 0.0737 | 0.0007 | 565 | 27.8 | 477 | 5.0 | 458 | 4.1 |

| Sample:LAZK205-01 | Content (ppm) and ratio |                  |                                     | Isotopic ratio                       |        |                                     |        |                                     |        | Age (Ma)                             |    |                                     |    |                                     |    |
|-------------------|-------------------------|------------------|-------------------------------------|--------------------------------------|--------|-------------------------------------|--------|-------------------------------------|--------|--------------------------------------|----|-------------------------------------|----|-------------------------------------|----|
| Sport             | <sup>232</sup> Th       | <sup>238</sup> U | <sup>232</sup> Th/ <sup>238</sup> U | <sup>207</sup> Pb/ <sup>206</sup> Pb |        | <sup>207</sup> Pb/ <sup>235</sup> U |        | <sup>206</sup> Pb/ <sup>238</sup> U |        | <sup>207</sup> Pb/ <sup>206</sup> Pb |    | <sup>207</sup> Pb/ <sup>235</sup> U |    | <sup>206</sup> Pb/ <sup>238</sup> U |    |
|                   |                         |                  |                                     | Ratio                                | 1σ     | Ratio                               | 1σ     | Ratio                               | 1σ     | Age                                  | 1σ | Age                                 | 1σ | Age                                 | 1σ |
| ILAZK205-01-01    | 1876.59                 | 1818.25          | 1.03                                | 0.0596                               | 0.0013 | 0.5141                              | 0.0209 | 0.0625                              | 0.0016 | 591                                  | 45 | 421                                 | 14 | 391                                 | 10 |
| ILAZK205-01-02    | 1757.22                 | 1659.65          | 1.06                                | 0.0585                               | 0.0013 | 0.5319                              | 0.0220 | 0.0659                              | 0.0017 | 549                                  | 46 | 433                                 | 15 | 412                                 | 10 |
| ILAZK205-01-03    | 1750.97                 | 1694.83          | 1.03                                | 0.0568                               | 0.0012 | 0.5441                              | 0.0220 | 0.0694                              | 0.0018 | 485                                  | 44 | 441                                 | 14 | 433                                 | 11 |
| ILAZK205-01-04    | 4328.14                 | 2385.97          | 1.81                                | 0.0550                               | 0.0011 | 0.5077                              | 0.0200 | 0.0670                              | 0.0017 | 411                                  | 43 | 417                                 | 13 | 418                                 | 10 |
| ILAZK205-01-05    | 1590.33                 | 1373.16          | 1.16                                | 0.0542                               | 0.0012 | 0.4859                              | 0.0201 | 0.0650                              | 0.0017 | 381                                  | 46 | 402                                 | 14 | 406                                 | 10 |
| ILAZK205-01-06    | 4338.74                 | 3442.79          | 1.26                                | 0.0538                               | 0.0010 | 0.4904                              | 0.0188 | 0.0661                              | 0.0017 | 362                                  | 41 | 405                                 | 13 | 413                                 | 10 |
| ILAZK205-01-07    | 941.86                  | 1057.07          | 0.89                                | 0.0629                               | 0.0017 | 0.6038                              | 0.0297 | 0.0697                              | 0.0019 | 704                                  | 56 | 480                                 | 19 | 434                                 | 11 |
| ILAZK205-01-08    | 1490.16                 | 1269.18          | 1.17                                | 0.0574                               | 0.0013 | 0.5507                              | 0.0231 | 0.0696                              | 0.0018 | 506                                  | 46 | 445                                 | 15 | 434                                 | 11 |
| ILAZK205-01-09    | 2037.10                 | 1553.53          | 1.31                                | 0.0628                               | 0.0013 | 0.6115                              | 0.0253 | 0.0707                              | 0.0019 | 700                                  | 43 | 484                                 | 16 | 440                                 | 11 |
| ILAZK205-01-10    | 1495.85                 | 1389.98          | 1.08                                | 0.0566                               | 0.0012 | 0.5342                              | 0.0215 | 0.0685                              | 0.0018 | 475                                  | 44 | 435                                 | 14 | 427                                 | 11 |
| ILAZK205-01-11    | 1622.48                 | 1687.58          | 0.96                                | 0.0648                               | 0.0014 | 0.5498                              | 0.0234 | 0.0615                              | 0.0017 | 769                                  | 44 | 445                                 | 15 | 385                                 | 10 |
| ILAZK205-01-12    | 1634.19                 | 1910.89          | 0.86                                | 0.0563                               | 0.0014 | 0.5343                              | 0.0247 | 0.0689                              | 0.0020 | 462                                  | 51 | 435                                 | 16 | 429                                 | 12 |
| ILAZK205-01-14    | 1359.43                 | 1279.34          | 1.06                                | 0.0546                               | 0.0013 | 0.5114                              | 0.0221 | 0.0680                              | 0.0017 | 394                                  | 50 | 419                                 | 15 | 424                                 | 11 |
| ILAZK205-01-15    | 3693.68                 | 2226.58          | 1.66                                | 0.0549                               | 0.0011 | 0.4921                              | 0.0195 | 0.0650                              | 0.0017 | 408                                  | 42 | 406                                 | 13 | 406                                 | 11 |
| ILAZK205-01-16    | 2162.45                 | 1544.30          | 1.40                                | 0.0547                               | 0.0012 | 0.4952                              | 0.0211 | 0.0657                              | 0.0018 | 398                                  | 47 | 408                                 | 14 | 410                                 | 11 |
| ILAZK205-01-17    | 1213.23                 | 1281.21          | 0.95                                | 0.0551                               | 0.0014 | 0.4902                              | 0.0241 | 0.0645                              | 0.0019 | 418                                  | 56 | 405                                 | 16 | 403                                 | 11 |
| ILAZK205-01-18    | 1190.79                 | 1213.58          | 0.98                                | 0.0644                               | 0.0014 | 0.5824                              | 0.0242 | 0.0656                              | 0.0017 | 754                                  | 43 | 466                                 | 16 | 410                                 | 10 |
| ILAZK205-01-19    | 2001.68                 | 1814.69          | 1.10                                | 0.0587                               | 0.0013 | 0.4937                              | 0.0214 | 0.0610                              | 0.0017 | 557                                  | 47 | 407                                 | 15 | 382                                 | 10 |
| ILAZK205-01-20    | 4650.02                 | 4290.28          | 1.08                                | 0.0555                               | 0.0011 | 0.4876                              | 0.0200 | 0.0637                              | 0.0017 | 433                                  | 43 | 403                                 | 14 | 398                                 | 11 |
| ILAZK205-01-21    | 799.99                  | 936.89           | 0.85                                | 0.0560                               | 0.0017 | 0.5101                              | 0.0271 | 0.0661                              | 0.0019 | 451                                  | 64 | 419                                 | 18 | 413                                 | 12 |
| ILAZK205-01-22    | 7099.21                 | 4594.53          | 1.55                                | 0.0616                               | 0.0016 | 0.5406                              | 0.0258 | 0.0636                              | 0.0019 | 662                                  | 52 | 439                                 | 17 | 398                                 | 11 |
| ILAZK205-01-24    | 1936.37                 | 1503.57          | 1.29                                | 0.0560                               | 0.0013 | 0.4948                              | 0.0214 | 0.0641                              | 0.0017 | 451                                  | 48 | 408                                 | 15 | 401                                 | 10 |

|                |         |         |      |        |        |        |        |        |        |      |    |     |    |     |    |
|----------------|---------|---------|------|--------|--------|--------|--------|--------|--------|------|----|-----|----|-----|----|
| ILAZK205-01-25 | 2552.96 | 1908.68 | 1.34 | 0.0544 | 0.0011 | 0.4868 | 0.0199 | 0.0649 | 0.0018 | 387  | 44 | 403 | 14 | 405 | 11 |
| ILAZK205-01-26 | 1093.57 | 1165.75 | 0.94 | 0.0634 | 0.0019 | 0.6267 | 0.0330 | 0.0717 | 0.0021 | 723  | 60 | 494 | 21 | 446 | 12 |
| ILAZK205-01-27 | 1782.54 | 1429.95 | 1.25 | 0.0564 | 0.0013 | 0.4996 | 0.0221 | 0.0643 | 0.0018 | 468  | 48 | 411 | 15 | 401 | 11 |
| ILAZK205-01-28 | 962.51  | 1024.25 | 0.94 | 0.0570 | 0.0015 | 0.5464 | 0.0264 | 0.0696 | 0.0020 | 490  | 55 | 443 | 17 | 434 | 12 |
| ILAZK205-01-29 | 1156.22 | 1005.89 | 1.15 | 0.0729 | 0.0017 | 0.6643 | 0.0294 | 0.0661 | 0.0018 | 1010 | 44 | 517 | 18 | 413 | 11 |
| ILAZK205-01-30 | 2304.02 | 1649.32 | 1.40 | 0.0565 | 0.0012 | 0.5210 | 0.0217 | 0.0669 | 0.0018 | 472  | 44 | 426 | 14 | 417 | 11 |
| ILAZK205-01-31 | 1525.98 | 1381.01 | 1.10 | 0.0544 | 0.0013 | 0.5510 | 0.0265 | 0.0735 | 0.0022 | 387  | 53 | 446 | 17 | 457 | 13 |
| ILAZK205-01-32 | 1362.95 | 1262.53 | 1.08 | 0.0595 | 0.0014 | 0.5953 | 0.0270 | 0.0725 | 0.0021 | 587  | 48 | 474 | 17 | 451 | 12 |
| ILAZK205-01-33 | 868.40  | 913.05  | 0.95 | 0.0563 | 0.0014 | 0.5747 | 0.0270 | 0.0740 | 0.0020 | 464  | 54 | 461 | 17 | 460 | 12 |
| ILAZK205-01-34 | 1553.30 | 1523.56 | 1.02 | 0.0587 | 0.0012 | 0.5764 | 0.0236 | 0.0713 | 0.0019 | 555  | 43 | 462 | 15 | 444 | 12 |
| ILAZK205-01-35 | 1228.60 | 1173.42 | 1.05 | 0.0552 | 0.0013 | 0.5291 | 0.0242 | 0.0696 | 0.0020 | 419  | 51 | 431 | 16 | 433 | 12 |
| ILAZK205-01-36 | 2794.23 | 1633.37 | 1.71 | 0.0560 | 0.0011 | 0.5108 | 0.0210 | 0.0662 | 0.0018 | 452  | 43 | 419 | 14 | 413 | 11 |
| ILAZK205-01-37 | 1729.88 | 1715.15 | 1.01 | 0.0539 | 0.0012 | 0.5223 | 0.0228 | 0.0702 | 0.0020 | 368  | 47 | 427 | 15 | 438 | 12 |
| ILAZK205-01-38 | 2414.46 | 1697.90 | 1.42 | 0.0559 | 0.0014 | 0.4989 | 0.0239 | 0.0648 | 0.0019 | 447  | 53 | 411 | 16 | 405 | 12 |
| ILAZK205-01-39 | 2150.60 | 1770.70 | 1.21 | 0.0584 | 0.0012 | 0.5368 | 0.0220 | 0.0667 | 0.0017 | 544  | 44 | 436 | 15 | 416 | 10 |
| ILAZK205-01-40 | 2352.49 | 1767.26 | 1.33 | 0.0548 | 0.0012 | 0.5068 | 0.0216 | 0.0671 | 0.0018 | 404  | 47 | 416 | 15 | 419 | 11 |



| Sample:LAZK205-02 | Content (ppm) and ratio |                  |                                     | Isotopic ratio                       |         |                                     |         |                                     |         | Age (Ma)                             |    |                                     |    |                                     |    |
|-------------------|-------------------------|------------------|-------------------------------------|--------------------------------------|---------|-------------------------------------|---------|-------------------------------------|---------|--------------------------------------|----|-------------------------------------|----|-------------------------------------|----|
| Sport             | <sup>232</sup> Th       | <sup>238</sup> U | <sup>232</sup> Th/ <sup>238</sup> U | <sup>207</sup> Pb/ <sup>206</sup> Pb |         | <sup>207</sup> Pb/ <sup>235</sup> U |         | <sup>206</sup> Pb/ <sup>238</sup> U |         | <sup>207</sup> Pb/ <sup>206</sup> Pb |    | <sup>207</sup> Pb/ <sup>235</sup> U |    | <sup>206</sup> Pb/ <sup>238</sup> U |    |
|                   |                         |                  |                                     | Ratio                                | 1σ      | Ratio                               | 1σ      | Ratio                               | 1σ      | Age                                  | 1σ | Age                                 | 1σ | Age                                 | 1σ |
| ILAZK205-02-01    | 3616.32                 | 2481.46          | 1.46                                | 0.05619                              | 0.00114 | 0.48302                             | 0.02179 | 0.06235                             | 0.00220 | 460                                  | 43 | 400                                 | 15 | 390                                 | 13 |
| ILAZK205-02-02    | 2658.54                 | 2046.79          | 1.30                                | 0.05409                              | 0.00113 | 0.54690                             | 0.02512 | 0.07332                             | 0.00260 | 375                                  | 45 | 443                                 | 16 | 456                                 | 16 |
| ILAZK205-02-03    | 2718.11                 | 1851.79          | 1.47                                | 0.05674                              | 0.00118 | 0.47947                             | 0.02195 | 0.06129                             | 0.00216 | 481                                  | 44 | 398                                 | 15 | 383                                 | 13 |
| ILAZK205-02-04    | 1690.56                 | 1201.73          | 1.41                                | 0.05699                              | 0.00128 | 0.49747                             | 0.02397 | 0.06331                             | 0.00225 | 491                                  | 47 | 410                                 | 16 | 396                                 | 14 |
| ILAZK205-02-05    | 1998.64                 | 1792.26          | 1.12                                | 0.05575                              | 0.00118 | 0.53516                             | 0.02473 | 0.06962                             | 0.00246 | 443                                  | 45 | 435                                 | 16 | 434                                 | 15 |
| ILAZK205-02-06    | 1746.01                 | 1459.44          | 1.20                                | 0.05545                              | 0.00118 | 0.50948                             | 0.02374 | 0.06664                             | 0.00235 | 430                                  | 45 | 418                                 | 16 | 416                                 | 14 |
| ILAZK205-02-07    | 2682.23                 | 2248.59          | 1.19                                | 0.05493                              | 0.00114 | 0.47316                             | 0.02162 | 0.06248                             | 0.00221 | 409                                  | 44 | 393                                 | 15 | 391                                 | 13 |
| ILAZK205-02-08    | 2239.29                 | 1706.95          | 1.31                                | 0.05835                              | 0.00160 | 0.61210                             | 0.03371 | 0.07609                             | 0.00277 | 543                                  | 57 | 485                                 | 21 | 473                                 | 17 |
| ILAZK205-02-09    | 1848.80                 | 1480.59          | 1.25                                | 0.05782                              | 0.00126 | 0.56331                             | 0.02671 | 0.07066                             | 0.00251 | 523                                  | 46 | 454                                 | 17 | 440                                 | 15 |
| ILAZK205-02-10    | 1018.80                 | 1066.48          | 0.96                                | 0.05837                              | 0.00139 | 0.54155                             | 0.02715 | 0.06729                             | 0.00240 | 544                                  | 50 | 439                                 | 18 | 420                                 | 15 |
| ILAZK205-02-11    | 564.48                  | 642.98           | 0.88                                | 0.05486                              | 0.00146 | 0.52973                             | 0.02861 | 0.07003                             | 0.00254 | 407                                  | 57 | 432                                 | 19 | 436                                 | 15 |
| ILAZK205-02-12    | 1477.28                 | 1352.76          | 1.09                                | 0.05825                              | 0.00124 | 0.52189                             | 0.02427 | 0.06497                             | 0.00230 | 539                                  | 44 | 426                                 | 16 | 406                                 | 14 |
| ILAZK205-02-13    | 1276.81                 | 1024.31          | 1.25                                | 0.05504                              | 0.00122 | 0.53451                             | 0.02560 | 0.07043                             | 0.00250 | 414                                  | 47 | 435                                 | 17 | 439                                 | 15 |
| ILAZK205-02-14    | 2133.21                 | 1674.89          | 1.27                                | 0.05660                              | 0.00116 | 0.53799                             | 0.02433 | 0.06893                             | 0.00243 | 476                                  | 43 | 437                                 | 16 | 430                                 | 15 |
| ILAZK205-02-15    | 1327.00                 | 1293.59          | 1.03                                | 0.05666                              | 0.00121 | 0.50477                             | 0.02356 | 0.06462                             | 0.00228 | 478                                  | 45 | 415                                 | 16 | 404                                 | 14 |
| ILAZK205-02-16    | 1402.59                 | 1355.19          | 1.03                                | 0.05499                              | 0.00117 | 0.53939                             | 0.02499 | 0.07113                             | 0.00251 | 412                                  | 45 | 438                                 | 16 | 443                                 | 15 |
| ILAZK205-02-17    | 4987.65                 | 3136.11          | 1.59                                | 0.05527                              | 0.00111 | 0.47987                             | 0.02147 | 0.06297                             | 0.00223 | 423                                  | 43 | 398                                 | 15 | 394                                 | 14 |
| ILAZK205-02-18    | 1715.58                 | 1632.75          | 1.05                                | 0.05597                              | 0.00117 | 0.54065                             | 0.02491 | 0.07006                             | 0.00249 | 451                                  | 44 | 439                                 | 16 | 437                                 | 15 |
| ILAZK205-02-19    | 1647.51                 | 1605.95          | 1.03                                | 0.05630                              | 0.00125 | 0.52745                             | 0.02537 | 0.06795                             | 0.00244 | 464                                  | 47 | 430                                 | 17 | 424                                 | 15 |
| ILAZK205-02-20    | 1236.19                 | 1253.41          | 0.99                                | 0.05744                              | 0.00121 | 0.54123                             | 0.02496 | 0.06833                             | 0.00241 | 509                                  | 44 | 439                                 | 16 | 426                                 | 15 |
| ILAZK205-02-21    | 3451.30                 | 2435.24          | 1.42                                | 0.05488                              | 0.00118 | 0.55656                             | 0.02612 | 0.07355                             | 0.00261 | 407                                  | 46 | 449                                 | 17 | 458                                 | 16 |
| ILAZK205-02-22    | 836.50                  | 870.18           | 0.96                                | 0.05678                              | 0.00121 | 0.57036                             | 0.02668 | 0.07285                             | 0.00260 | 483                                  | 45 | 458                                 | 17 | 453                                 | 16 |

|                |         |         |      |         |         |         |         |         |         |     |    |     |    |     |    |
|----------------|---------|---------|------|---------|---------|---------|---------|---------|---------|-----|----|-----|----|-----|----|
| ILAZK205-02-23 | 1098.78 | 1012.42 | 1.09 | 0.06048 | 0.00132 | 0.56465 | 0.02672 | 0.06771 | 0.00240 | 621 | 45 | 455 | 17 | 422 | 14 |
| ILAZK205-02-24 | 1570.54 | 1724.40 | 0.91 | 0.05571 | 0.00117 | 0.48683 | 0.02243 | 0.06338 | 0.00224 | 441 | 45 | 403 | 15 | 396 | 14 |
| ILAZK205-02-25 | 1708.57 | 1613.79 | 1.06 | 0.05583 | 0.00116 | 0.55858 | 0.02565 | 0.07257 | 0.00257 | 446 | 44 | 451 | 17 | 452 | 15 |
| ILAZK205-02-26 | 3779.98 | 2283.42 | 1.66 | 0.05675 | 0.00115 | 0.49453 | 0.02222 | 0.06320 | 0.00224 | 482 | 43 | 408 | 15 | 395 | 14 |
| ILAZK205-02-27 | 2468.75 | 1994.98 | 1.24 | 0.05505 | 0.00116 | 0.47054 | 0.02176 | 0.06199 | 0.00220 | 414 | 45 | 392 | 15 | 388 | 13 |
| ILAZK205-02-28 | 1738.55 | 1461.41 | 1.19 | 0.05516 | 0.00126 | 0.52741 | 0.02568 | 0.06934 | 0.00247 | 419 | 49 | 430 | 17 | 432 | 15 |
| ILAZK205-02-29 | 1516.46 | 1412.35 | 1.07 | 0.06371 | 0.00133 | 0.57273 | 0.02627 | 0.06520 | 0.00231 | 732 | 42 | 460 | 17 | 407 | 14 |
| ILAZK205-02-30 | 1429.50 | 1359.98 | 1.05 | 0.05581 | 0.00138 | 0.53983 | 0.02787 | 0.07016 | 0.00253 | 445 | 53 | 438 | 18 | 437 | 15 |
| ILAZK205-02-31 | 1046.30 | 1155.69 | 0.91 | 0.05514 | 0.00118 | 0.53338 | 0.02495 | 0.07016 | 0.00248 | 418 | 46 | 434 | 17 | 437 | 15 |
| ILAZK205-02-32 | 2060.09 | 1612.71 | 1.28 | 0.05687 | 0.00120 | 0.55708 | 0.02568 | 0.07105 | 0.00251 | 486 | 44 | 450 | 17 | 442 | 15 |
| ILAZK205-02-33 | 1698.15 | 1493.88 | 1.14 | 0.05627 | 0.00120 | 0.52624 | 0.02459 | 0.06783 | 0.00241 | 463 | 45 | 429 | 16 | 423 | 15 |
| ILAZK205-02-34 | 1049.91 | 1081.02 | 0.97 | 0.05695 | 0.00129 | 0.52537 | 0.02553 | 0.06691 | 0.00238 | 490 | 48 | 429 | 17 | 417 | 14 |
| ILAZK205-02-35 | 1567.73 | 1569.84 | 1.00 | 0.05624 | 0.00116 | 0.52230 | 0.02380 | 0.06736 | 0.00238 | 462 | 44 | 427 | 16 | 420 | 14 |
| ILAZK205-02-36 | 1474.67 | 1412.15 | 1.04 | 0.05645 | 0.00132 | 0.52448 | 0.02602 | 0.06738 | 0.00240 | 470 | 49 | 428 | 17 | 420 | 15 |
| ILAZK205-02-37 | 1798.12 | 1635.26 | 1.10 | 0.05738 | 0.00121 | 0.48933 | 0.02255 | 0.06185 | 0.00218 | 506 | 45 | 404 | 15 | 387 | 13 |
| ILAZK205-02-38 | 2512.41 | 1726.22 | 1.46 | 0.05470 | 0.00114 | 0.52328 | 0.02401 | 0.06939 | 0.00244 | 400 | 46 | 427 | 16 | 432 | 15 |
| ILAZK205-02-39 | 2377.53 | 1799.28 | 1.32 | 0.05698 | 0.00116 | 0.55562 | 0.02515 | 0.07073 | 0.00251 | 491 | 44 | 449 | 16 | 441 | 15 |
| ILAZK205-02-40 | 1152.69 | 1189.37 | 0.97 | 0.05477 | 0.00121 | 0.53073 | 0.02539 | 0.07028 | 0.00251 | 403 | 49 | 432 | 17 | 438 | 15 |
